# Supplementary material for: The COM-Poisson Process for Stochastic Modeling of Osmotic Inactivation Dynamics of Listeria monocytogenes
Source: Front Microbiol. 2021 Jul 9;12:681468. doi: 10.3389/fmicb.2021.681468 (PMC8300431; doi:10.3389/fmicb.2021.681468)
Supplement: Supplementary Table 2 — Excel workbook containing Poisson and COM-Poisson regressions as examples. [file Table_2.XLS]

## Sheet: CMP (v(N))
				N Average	sd	nTot						MC Search N
				89.4891	57.3682	92						Start Value
												End Value
											Title	maxLog-L(CMP)	b0	b1	c0
												-397.823	5.28304	-0.155982	0.0529737
Trial	Concentration	Experiment	Time	CFU/0.2 ml	Average CFU/0.2 ml				X	Y	Ycalc	Log-l(CMP)	i				μ	λ	ν(N)
V	HH	VHH	3	89	136.389				3	89	126.971	-5.00517					123.358	1.79575	0.12158
V	HH	VHH	3	130	136.389				3	130	126.971	-4.4047					123.358	1.79575	0.12158
V	HH	VHH	3	76	136.389				3	76	126.971	-5.63307					123.358	1.79575	0.12158
V	HH	VHH	3	125	136.389				3	125	126.971	-4.38228					123.358	1.79575	0.12158
V	HH	VHH	6	90	98.65				6	90	79.8707	-4.17947					77.2578	2.01021	0.160621
V	HH	VHH	6	98	98.65				6	98	79.8707	-4.43796					77.2578	2.01021	0.160621
V	HH	VHH	6	103	98.65				6	103	79.8707	-4.65309					77.2578	2.01021	0.160621
V	HH	VHH	6	91	98.65				6	91	79.8707	-4.20577					77.2578	2.01021	0.160621
V	HH	VHH	6	68	98.65				6	68	79.8707	-4.08969					77.2578	2.01021	0.160621
V	HH	VHH	10	34	44.4211				10	34	42.574	-3.5669					41.3974	3.03547	0.298227
V	HH	VHH	10	71	44.4211				10	71	42.574	-6.06062					41.3974	3.03547	0.298227
V	HH	VHH	10	37	44.4211				10	37	42.574	-3.44168					41.3974	3.03547	0.298227
V	HH	VHH	10	38	44.4211				10	38	42.574	-3.41615					41.3974	3.03547	0.298227
V	HH	VHH	10	38	44.4211				10	38	42.574	-3.41615					41.3974	3.03547	0.298227
V	HH	VHH	13	23	22.1				13	23	26.512	-2.98732					25.9267	4.48003	0.460677
V	HH	VHH	13	19	22.1				13	19	26.512	-3.33481					25.9267	4.48003	0.460677
V	HH	VHH	13	16	22.1				13	16	26.512	-3.84053					25.9267	4.48003	0.460677
V	HH	VHH	13	16	22.1				13	16	26.512	-3.84053					25.9267	4.48003	0.460677
V	HH	VHH	13	24	22.1				13	24	26.512	-2.95174					25.9267	4.48003	0.460677
V	HH	VHH	0	176	167.933				0	176	201.416	-4.81789					196.968	1.70549	0.10105
V	HH	VHH	0	162	167.933				0	162	201.416	-5.03076					196.968	1.70549	0.10105
V	HH	VHH	0	117	167.933				0	117	201.416	-6.60291					196.968	1.70549	0.10105
V	HH	VHH	0	254	167.933				0	254	201.416	-5.4832					196.968	1.70549	0.10105
V	HH	VHH	0	171	167.933				0	171	201.416	-4.88055					196.968	1.70549	0.10105
V	HH	VHH	3	161	136.389				3	161	126.971	-5.03272					123.358	1.79575	0.12158
V	HH	VHH	3	184	136.389				3	184	126.971	-5.97638					123.358	1.79575	0.12158
V	HH	VHH	3	125	136.389				3	125	126.971	-4.38228					123.358	1.79575	0.12158
V	HH	VHH	3	168	136.389				3	168	126.971	-5.2802					123.358	1.79575	0.12158
V	HH	VHH	3	144	136.389				3	144	126.971	-4.5887					123.358	1.79575	0.12158
V	HH	VHH	6	103	98.65				6	103	79.8707	-4.65309					77.2578	2.01021	0.160621
V	HH	VHH	6	118	98.65				6	118	79.8707	-5.52435					77.2578	2.01021	0.160621
V	HH	VHH	6	83	98.65				6	83	79.8707	-4.04624					77.2578	2.01021	0.160621
V	HH	VHH	6	116	98.65				6	116	79.8707	-5.38966					77.2578	2.01021	0.160621
V	HH	VHH	6	106	98.65				6	106	79.8707	-4.80091					77.2578	2.01021	0.160621
V	HH	VHH	10	42	44.4211				10	42	42.574	-3.38955					41.3974	3.03547	0.298227
V	HH	VHH	10	37	44.4211				10	37	42.574	-3.44168					41.3974	3.03547	0.298227
V	HH	VHH	10	39	44.4211				10	39	42.574	-3.39835					41.3974	3.03547	0.298227
V	HH	VHH	10	49	44.4211				10	49	42.574	-3.60765					41.3974	3.03547	0.298227
V	HH	VHH	13	10	22.1				13	10	26.512	-5.66675					25.9267	4.48003	0.460677
V	HH	VHH	13	21	22.1				13	21	26.512	-3.11815					25.9267	4.48003	0.460677
V	HH	VHH	13	28	22.1				13	28	26.512	-2.99041					25.9267	4.48003	0.460677
V	HH	VHH	13	25	22.1				13	25	26.512	-2.93498					25.9267	4.48003	0.460677
V	HH	VHH	13	31	22.1				13	31	26.512	-3.19157					25.9267	4.48003	0.460677
V	HH	VHH	0	151	167.933				0	151	201.416	-5.28308					196.968	1.70549	0.10105
V	HH	VHH	0	145	167.933				0	145	201.416	-5.45438					196.968	1.70549	0.10105
V	HH	VHH	0	196	167.933				0	196	201.416	-4.70656					196.968	1.70549	0.10105
V	HH	VHH	0	142	167.933				0	142	201.416	-5.54934					196.968	1.70549	0.10105
V	HH	VHH	0	194	167.933				0	194	201.416	-4.70807					196.968	1.70549	0.10105
V	HH	VHH	3	177	136.389				3	177	126.971	-5.65014					123.358	1.79575	0.12158
V	HH	VHH	3	145	136.389				3	145	126.971	-4.60835					123.358	1.79575	0.12158
V	HH	VHH	3	161	136.389				3	161	126.971	-5.03272					123.358	1.79575	0.12158
V	HH	VHH	3	129	136.389				3	129	126.971	-4.39832					123.358	1.79575	0.12158
V	HH	VHH	3	133	136.389				3	133	126.971	-4.42939					123.358	1.79575	0.12158
V	HH	VHH	6	79	98.65				6	79	79.8707	-4.01196					77.2578	2.01021	0.160621
V	HH	VHH	6	86	98.65				6	86	79.8707	-4.09224					77.2578	2.01021	0.160621
V	HH	VHH	6	95	98.65				6	95	79.8707	-4.32832					77.2578	2.01021	0.160621
V	HH	VHH	6	141	98.65				6	141	79.8707	-7.44198					77.2578	2.01021	0.160621
V	HH	VHH	6	111	98.65				6	111	79.8707	-5.07727					77.2578	2.01021	0.160621
V	HH	VHH	10	50	44.4211				10	50	42.574	-3.66395					41.3974	3.03547	0.298227
V	HH	VHH	10	61	44.4211				10	61	42.574	-4.64986					41.3974	3.03547	0.298227
V	HH	VHH	10	45	44.4211				10	45	42.574	-3.44394					41.3974	3.03547	0.298227
V	HH	VHH	10	58	44.4211				10	58	42.574	-4.3179					41.3974	3.03547	0.298227
V	HH	VHH	10	55	44.4211				10	55	42.574	-4.03184					41.3974	3.03547	0.298227
V	HH	VHH	13	26	22.1				13	26	26.512	-2.93628					25.9267	4.48003	0.460677
V	HH	VHH	13	19	22.1				13	19	26.512	-3.33481					25.9267	4.48003	0.460677
V	HH	VHH	13	24	22.1				13	24	26.512	-2.95174					25.9267	4.48003	0.460677
V	HH	VHH	13	26	22.1				13	26	26.512	-2.93628					25.9267	4.48003	0.460677
V	HH	VHH	13	34	22.1				13	34	26.512	-3.52454					25.9267	4.48003	0.460677
V	HH	VHH	0	147	167.933				0	147	201.416	-5.39455					196.968	1.70549	0.10105
V	HH	VHH	0	180	167.933				0	180	201.416	-4.77809					196.968	1.70549	0.10105
V	HH	VHH	0	177	167.933				0	177	201.416	-4.80709					196.968	1.70549	0.10105
V	HH	VHH	0	162	167.933				0	162	201.416	-5.03076					196.968	1.70549	0.10105
V	HH	VHH	0	145	167.933				0	145	201.416	-5.45438					196.968	1.70549	0.10105
V	HH	VHH	3	120	136.389				3	120	126.971	-4.38409					123.358	1.79575	0.12158
V	HH	VHH	3	135	136.389				3	135	126.971	-4.45041					123.358	1.79575	0.12158
V	HH	VHH	3	126	136.389				3	126	126.971	-4.38486					123.358	1.79575	0.12158
V	HH	VHH	3	127	136.389				3	127	126.971	-4.3884					123.358	1.79575	0.12158
V	HH	VHH	6	103	98.65				6	103	79.8707	-4.65309					77.2578	2.01021	0.160621
V	HH	VHH	6	62	98.65				6	62	79.8707	-4.24913					77.2578	2.01021	0.160621
V	HH	VHH	6	93	98.65				6	93	79.8707	-4.26361					77.2578	2.01021	0.160621
V	HH	VHH	6	124	98.65				6	124	79.8707	-5.9606					77.2578	2.01021	0.160621
V	HH	VHH	6	103	98.65				6	103	79.8707	-4.65309					77.2578	2.01021	0.160621
V	HH	VHH	10	39	44.4211				10	39	42.574	-3.39835					41.3974	3.03547	0.298227
V	HH	VHH	10	32	44.4211				10	32	42.574	-3.69322					41.3974	3.03547	0.298227
V	HH	VHH	10	39	44.4211				10	39	42.574	-3.39835					41.3974	3.03547	0.298227
V	HH	VHH	10	38	44.4211				10	38	42.574	-3.41615					41.3974	3.03547	0.298227
V	HH	VHH	10	42	44.4211				10	42	42.574	-3.38955					41.3974	3.03547	0.298227
V	HH	VHH	13	20	22.1				13	20	26.512	-3.21524					25.9267	4.48003	0.460677
V	HH	VHH	13	20	22.1				13	20	26.512	-3.21524					25.9267	4.48003	0.460677
V	HH	VHH	13	19	22.1				13	19	26.512	-3.33481					25.9267	4.48003	0.460677
V	HH	VHH	13	14	22.1				13	14	26.512	-4.31499					25.9267	4.48003	0.460677
V	HH	VHH	13	27	22.1				13	27	26.512	-2.95497					25.9267	4.48003	0.460677

## Sheet: CMP
				N Average	sd	nTot						MC Search N
				89.4891	57.3682	92						Start Value
												End Value
											Title	maxLog-L(CMP)	b0	b1	ν
												-404.598	5.23933	-0.144695	0.182717
Trial	Concentration	Experiment	Time	CFU/0.2 ml	Average CFU/0.2 ml				X	Y	Ycalc	Log-l(CMP)	i				μ	λ
V	HH	VHH	3	89	136.389				3	89	124.386	-5.05105					122.149	2.40608
V	HH	VHH	3	130	136.389				3	130	124.386	-4.22242					122.149	2.40608
V	HH	VHH	3	76	136.389				3	76	124.386	-5.9713					122.149	2.40608
V	HH	VHH	3	125	136.389				3	125	124.386	-4.17973					122.149	2.40608
V	HH	VHH	6	90	98.65				6	90	81.3718	-4.09678					79.1353	2.22262
V	HH	VHH	6	98	98.65				6	98	81.3718	-4.35572					79.1353	2.22262
V	HH	VHH	6	103	98.65				6	103	81.3718	-4.57851					79.1353	2.22262
V	HH	VHH	6	91	98.65				6	91	81.3718	-4.12231					79.1353	2.22262
V	HH	VHH	6	68	98.65				6	68	81.3718	-4.09117					79.1353	2.22262
V	HH	VHH	10	34	44.4211				10	34	46.5982	-3.88185					44.3618	1.99957
V	HH	VHH	10	71	44.4211				10	71	46.5982	-4.94214					44.3618	1.99957
V	HH	VHH	10	37	44.4211				10	37	46.5982	-3.76722					44.3618	1.99957
V	HH	VHH	10	38	44.4211				10	38	46.5982	-3.73894					44.3618	1.99957
V	HH	VHH	10	38	44.4211				10	38	46.5982	-3.73894					44.3618	1.99957
V	HH	VHH	13	23	22.1				13	23	30.9765	-3.5408					28.7401	1.8471
V	HH	VHH	13	19	22.1				13	19	30.9765	-3.75392					28.7401	1.8471
V	HH	VHH	13	16	22.1				13	16	30.9765	-4.01097					28.7401	1.8471
V	HH	VHH	13	16	22.1				13	16	30.9765	-4.01097					28.7401	1.8471
V	HH	VHH	13	24	22.1				13	24	30.9765	-3.50787					28.7401	1.8471
V	HH	VHH	0	176	167.933				0	176	190.78	-4.4603					188.544	2.60469
V	HH	VHH	0	162	167.933				0	162	190.78	-4.7334					188.544	2.60469
V	HH	VHH	0	117	167.933				0	117	190.78	-7.21673					188.544	2.60469
V	HH	VHH	0	254	167.933				0	254	190.78	-6.28623					188.544	2.60469
V	HH	VHH	0	171	167.933				0	171	190.78	-4.53367					188.544	2.60469
V	HH	VHH	3	161	136.389				3	161	124.386	-5.22203					122.149	2.40608
V	HH	VHH	3	184	136.389				3	184	124.386	-6.6816					122.149	2.40608
V	HH	VHH	3	125	136.389				3	125	124.386	-4.17973					122.149	2.40608
V	HH	VHH	3	168	136.389				3	168	124.386	-5.60654					122.149	2.40608
V	HH	VHH	3	144	136.389				3	144	124.386	-4.52413					122.149	2.40608
V	HH	VHH	6	103	98.65				6	103	81.3718	-4.57851					79.1353	2.22262
V	HH	VHH	6	118	98.65				6	118	81.3718	-5.50383					79.1353	2.22262
V	HH	VHH	6	83	98.65				6	83	81.3718	-3.97593					79.1353	2.22262
V	HH	VHH	6	116	98.65				6	116	81.3718	-5.35938					79.1353	2.22262
V	HH	VHH	6	106	98.65				6	106	81.3718	-4.73352					79.1353	2.22262
V	HH	VHH	10	42	44.4211				10	42	46.5982	-3.6721					44.3618	1.99957
V	HH	VHH	10	37	44.4211				10	37	46.5982	-3.76722					44.3618	1.99957
V	HH	VHH	10	39	44.4211				10	39	46.5982	-3.7154					44.3618	1.99957
V	HH	VHH	10	49	44.4211				10	49	46.5982	-3.71727					44.3618	1.99957
V	HH	VHH	13	10	22.1				13	10	30.9765	-4.84824					28.7401	1.8471
V	HH	VHH	13	21	22.1				13	21	30.9765	-3.63034					28.7401	1.8471
V	HH	VHH	13	28	22.1				13	28	30.9765	-3.44791					28.7401	1.8471
V	HH	VHH	13	25	22.1				13	25	30.9765	-3.48239					28.7401	1.8471
V	HH	VHH	13	31	22.1				13	31	30.9765	-3.47123					28.7401	1.8471
V	HH	VHH	0	151	167.933				0	151	190.78	-5.10179					188.544	2.60469
V	HH	VHH	0	145	167.933				0	145	190.78	-5.3636					188.544	2.60469
V	HH	VHH	0	196	167.933				0	196	190.78	-4.41872					188.544	2.60469
V	HH	VHH	0	142	167.933				0	142	190.78	-5.51135					188.544	2.60469
V	HH	VHH	0	194	167.933				0	194	190.78	-4.40548					188.544	2.60469
V	HH	VHH	3	177	136.389				3	177	124.386	-6.1787					122.149	2.40608
V	HH	VHH	3	145	136.389				3	145	124.386	-4.55547					122.149	2.40608
V	HH	VHH	3	161	136.389				3	161	124.386	-5.22203					122.149	2.40608
V	HH	VHH	3	129	136.389				3	129	124.386	-4.21103					122.149	2.40608
V	HH	VHH	3	133	136.389				3	133	124.386	-4.26492					122.149	2.40608
V	HH	VHH	6	79	98.65				6	79	81.3718	-3.95448					79.1353	2.22262
V	HH	VHH	6	86	98.65				6	86	81.3718	-4.0151					79.1353	2.22262
V	HH	VHH	6	95	98.65				6	95	81.3718	-4.24417					79.1353	2.22262
V	HH	VHH	6	141	98.65				6	141	81.3718	-7.58436					79.1353	2.22262
V	HH	VHH	6	111	98.65				6	111	81.3718	-5.02596					79.1353	2.22262
V	HH	VHH	10	50	44.4211				10	50	46.5982	-3.73913					44.3618	1.99957
V	HH	VHH	10	61	44.4211				10	61	46.5982	-4.20417					44.3618	1.99957
V	HH	VHH	10	45	44.4211				10	45	46.5982	-3.66751					44.3618	1.99957
V	HH	VHH	10	58	44.4211				10	58	46.5982	-4.03869					44.3618	1.99957
V	HH	VHH	10	55	44.4211				10	55	46.5982	-3.90134					44.3618	1.99957
V	HH	VHH	13	26	22.1				13	26	30.9765	-3.46409					28.7401	1.8471
V	HH	VHH	13	19	22.1				13	19	30.9765	-3.75392					28.7401	1.8471
V	HH	VHH	13	24	22.1				13	24	30.9765	-3.50787					28.7401	1.8471
V	HH	VHH	13	26	22.1				13	26	30.9765	-3.46409					28.7401	1.8471
V	HH	VHH	13	34	22.1				13	34	30.9765	-3.54682					28.7401	1.8471
V	HH	VHH	0	147	167.933				0	147	190.78	-5.2714					188.544	2.60469
V	HH	VHH	0	180	167.933				0	180	190.78	-4.42028					188.544	2.60469
V	HH	VHH	0	177	167.933				0	177	190.78	-4.44876					188.544	2.60469
V	HH	VHH	0	162	167.933				0	162	190.78	-4.7334					188.544	2.60469
V	HH	VHH	0	145	167.933				0	145	190.78	-5.3636					188.544	2.60469
V	HH	VHH	3	120	136.389				3	120	124.386	-4.17345					122.149	2.40608
V	HH	VHH	3	135	136.389				3	135	124.386	-4.30011					122.149	2.40608
V	HH	VHH	3	126	136.389				3	126	124.386	-4.1854					122.149	2.40608
V	HH	VHH	3	127	136.389				3	127	124.386	-4.19252					122.149	2.40608
V	HH	VHH	6	103	98.65				6	103	81.3718	-4.57851					79.1353	2.22262
V	HH	VHH	6	62	98.65				6	62	81.3718	-4.29887					79.1353	2.22262
V	HH	VHH	6	93	98.65				6	93	81.3718	-4.17933					79.1353	2.22262
V	HH	VHH	6	124	98.65				6	124	81.3718	-5.97376					79.1353	2.22262
V	HH	VHH	6	103	98.65				6	103	81.3718	-4.57851					79.1353	2.22262
V	HH	VHH	10	39	44.4211				10	39	46.5982	-3.7154					44.3618	1.99957
V	HH	VHH	10	32	44.4211				10	32	46.5982	-3.98452					44.3618	1.99957
V	HH	VHH	10	39	44.4211				10	39	46.5982	-3.7154					44.3618	1.99957
V	HH	VHH	10	38	44.4211				10	38	46.5982	-3.73894					44.3618	1.99957
V	HH	VHH	10	42	44.4211				10	42	46.5982	-3.6721					44.3618	1.99957
V	HH	VHH	13	20	22.1				13	20	30.9765	-3.68767					28.7401	1.8471
V	HH	VHH	13	20	22.1				13	20	30.9765	-3.68767					28.7401	1.8471
V	HH	VHH	13	19	22.1				13	19	30.9765	-3.75392					28.7401	1.8471
V	HH	VHH	13	14	22.1				13	14	30.9765	-4.2368					28.7401	1.8471
V	HH	VHH	13	27	22.1				13	27	30.9765	-3.45268					28.7401	1.8471

## Sheet: Poisson
				N Average	sd	nTot						MC Search N	0
				89.4891	57.3682	92						Start Value
												End Value
											Title	maxLog-L(Poisson)	b0	b1
												-528.317	5.2475	-0.140432
Trial	Concentration	Experiment	Time	CFU/0.2 ml	Average CFU/0.2 ml				X	Y	Ycalc	Log-l(Poisson)	i
V	HH	VHH	3	89	136.389				3	89	124.737	-8.85729
V	HH	VHH	3	130	136.389				3	130	124.737	-3.46286
V	HH	VHH	3	76	136.389				3	76	124.737	-14.1663
V	HH	VHH	3	125	136.389				3	125	124.737	-3.33404
V	HH	VHH	6	90	98.65				6	90	81.8517	-3.56252
V	HH	VHH	6	98	98.65				6	98	81.8517	-4.7097
V	HH	VHH	6	103	98.65				6	103	81.8517	-5.76026
V	HH	VHH	6	91	98.65				6	91	81.8517	-3.66847
V	HH	VHH	6	68	98.65				6	68	81.8517	-4.27432
V	HH	VHH	10	34	44.4211				10	34	46.6737	-4.58637
V	HH	VHH	10	71	44.4211				10	71	46.6737	-8.50959
V	HH	VHH	10	37	44.4211				10	37	46.6737	-3.80662
V	HH	VHH	10	38	44.4211				10	38	46.6737	-3.60102
V	HH	VHH	10	38	44.4211				10	38	46.6737	-3.60102
V	HH	VHH	13	23	22.1				13	23	30.6271	-3.53041
V	HH	VHH	13	19	22.1				13	19	30.6271	-4.95115
V	HH	VHH	13	16	22.1				13	16	30.6271	-6.54878
V	HH	VHH	13	16	22.1				13	16	30.6271	-6.54878
V	HH	VHH	13	24	22.1				13	24	30.6271	-3.28658
V	HH	VHH	0	176	167.933				0	176	190.091	-4.04031
V	HH	VHH	0	162	167.933				0	162	190.091	-5.64936
V	HH	VHH	0	117	167.933				0	117	190.091	-19.6082
V	HH	VHH	0	254	167.933				0	254	190.091	-13.3962
V	HH	VHH	0	171	167.933				0	171	190.091	-4.48271
V	HH	VHH	3	161	136.389				3	161	124.737	-8.28392
V	HH	VHH	3	184	136.389				3	184	124.737	-15.79
V	HH	VHH	3	125	136.389				3	125	124.737	-3.33404
V	HH	VHH	3	168	136.389				3	168	124.737	-10.2416
V	HH	VHH	3	144	136.389				3	144	124.737	-4.82069
V	HH	VHH	6	103	98.65				6	103	81.8517	-5.76026
V	HH	VHH	6	118	98.65				6	118	81.8517	-10.3182
V	HH	VHH	6	83	98.65				6	83	81.8517	-3.13738
V	HH	VHH	6	116	98.65				6	116	81.8517	-9.59516
V	HH	VHH	6	106	98.65				6	106	81.8517	-6.50733
V	HH	VHH	10	42	44.4211				10	42	46.6737	-3.03198
V	HH	VHH	10	37	44.4211				10	37	46.6737	-3.80662
V	HH	VHH	10	39	44.4211				10	39	46.6737	-3.4214
V	HH	VHH	10	49	44.4211				10	49	46.6737	-2.92358
V	HH	VHH	13	10	22.1				13	10	30.6271	-11.5126
V	HH	VHH	13	21	22.1				13	21	30.6271	-4.14764
V	HH	VHH	13	28	22.1				13	28	30.6271	-2.70405
V	HH	VHH	13	25	22.1				13	25	30.6271	-3.08357
V	HH	VHH	13	31	22.1				13	31	30.6271	-2.64088
V	HH	VHH	0	151	167.933				0	151	190.091	-7.75541
V	HH	VHH	0	145	167.933				0	145	190.091	-9.23731
V	HH	VHH	0	196	167.933				0	196	190.091	-3.64933
V	HH	VHH	0	142	167.933				0	142	190.091	-10.0704
V	HH	VHH	0	194	167.933				0	194	190.091	-3.59322
V	HH	VHH	3	177	136.389				3	177	124.737	-13.1844
V	HH	VHH	3	145	136.389				3	145	124.737	-4.97122
V	HH	VHH	3	161	136.389				3	161	124.737	-8.28392
V	HH	VHH	3	129	136.389				3	129	124.737	-3.42153
V	HH	VHH	3	133	136.389				3	133	124.737	-3.63259
V	HH	VHH	6	79	98.65				6	79	81.8517	-3.15498
V	HH	VHH	6	86	98.65				6	86	81.8517	-3.25047
V	HH	VHH	6	95	98.65				6	95	81.8517	-4.2004
V	HH	VHH	6	141	98.65				6	141	81.8517	-20.9286
V	HH	VHH	6	111	98.65				6	111	81.8517	-7.9391
V	HH	VHH	10	50	44.4211				10	50	46.6737	-2.99243
V	HH	VHH	10	61	44.4211				10	61	46.6737	-4.97872
V	HH	VHH	10	45	44.4211				10	45	46.6737	-2.8545
V	HH	VHH	10	58	44.4211				10	58	46.6737	-4.22551
V	HH	VHH	10	55	44.4211				10	55	46.6737	-3.6262
V	HH	VHH	13	26	22.1				13	26	30.6271	-2.91978
V	HH	VHH	13	19	22.1				13	19	30.6271	-4.95115
V	HH	VHH	13	24	22.1				13	24	30.6271	-3.28658
V	HH	VHH	13	26	22.1				13	26	30.6271	-2.91978
V	HH	VHH	13	34	22.1				13	34	30.6271	-2.86383
V	HH	VHH	0	147	167.933				0	147	190.091	-8.71635
V	HH	VHH	0	180	167.933				0	180	190.091	-3.78858
V	HH	VHH	0	177	167.933				0	177	190.091	-3.96896
V	HH	VHH	0	162	167.933				0	162	190.091	-5.64936
V	HH	VHH	0	145	167.933				0	145	190.091	-9.23731
V	HH	VHH	3	120	136.389				3	120	124.737	-3.40448
V	HH	VHH	3	135	136.389				3	135	124.737	-3.78329
V	HH	VHH	3	126	136.389				3	126	124.737	-3.34412
V	HH	VHH	3	127	136.389				3	127	124.737	-3.3621
V	HH	VHH	6	103	98.65				6	103	81.8517	-5.76026
V	HH	VHH	6	62	98.65				6	62	81.8517	-5.61352
V	HH	VHH	6	93	98.65				6	93	81.8517	-3.91304
V	HH	VHH	6	124	98.65				6	124	81.8517	-12.6876
V	HH	VHH	6	103	98.65				6	103	81.8517	-5.76026
V	HH	VHH	10	39	44.4211				10	39	46.6737	-3.4214
V	HH	VHH	10	32	44.4211				10	32	46.6737	-5.24987
V	HH	VHH	10	39	44.4211				10	39	46.6737	-3.4214
V	HH	VHH	10	38	44.4211				10	38	46.6737	-3.60102
V	HH	VHH	10	42	44.4211				10	42	46.6737	-3.03198
V	HH	VHH	13	20	22.1				13	20	30.6271	-4.525
V	HH	VHH	13	20	22.1				13	20	30.6271	-4.525
V	HH	VHH	13	19	22.1				13	19	30.6271	-4.95115
V	HH	VHH	13	14	22.1				13	14	30.6271	-7.91191
V	HH	VHH	13	27	22.1				13	27	30.6271	-2.79373

## Sheet: Instructions
Download SolverStat (https://www.freewebs.com/solverstat/).
Play with the Poisson sheet (“Table S2.xls”):
On Solverstat menu:
1) “Set Solver” to set Excel Solver parameters
2) “Run Solver” to done optimization
3) On “Poisson Regression” run “P.R. Statistic” to obtain regression statistics
4) Under “Regression Reliability” run “Bootstrap the Obs.” to obtain bootstrapped standard errors.
Play with the COM-Poisson sheet (“CMP” or “CMP (v(N)” in “Table S2.xls”):
On Solverstat menu:
1) “Set Solver” to set Excel Solver parameters
2) “Run Solver” to done optimization
3) Run "Regression Statistics” to obtain asymptotic regression statistics
4) Under “Regression Reliability” run “Bootstrap the Obs.” to obtain bootstrapped standard errors.
